# Supplementary material
Source: PubMed Central journal article supplement (PMC2887573)
Supplement: supp_90_8_1962__2.pdf [file supp_90_8_1962__2.pdf]

**Supplementary Table S1.** Vaccine treatment group comparisons at pre- and post-vaccination at 60 and 90 % neutralization

| Vaccine treatment comparison | 60% neutralization |                 |                  | 90% neutralization |                 |                  |
|------------------------------|--------------------|-----------------|------------------|--------------------|-----------------|------------------|
|                              | <i>n</i>           | <i>P</i> -value |                  | <i>n</i>           | <i>P</i> -value |                  |
|                              |                    | Pre-vaccination | Post-vaccination |                    | Pre-vaccination | Post-vaccination |
| Dryvax vs MVA SC             | 10 vs 14           | 0.8124          | 0.5468           | 12 vs 15           | 0.2928          | 0.0340           |
| Dryvax vs MVA IM             | 10 vs 25           | 0.0651          | 0.5780           | 12 vs 26           | 0.0264          | 0.0429           |
| MVA SC vs MVA IM             | 14 vs 25           | 0.0981          | 1.000            | 15 vs 26           | 0.1073          | 0.9892           |
