# Supplementary material
Source: PubMed Central journal article supplement (PMC2887573)

(b)

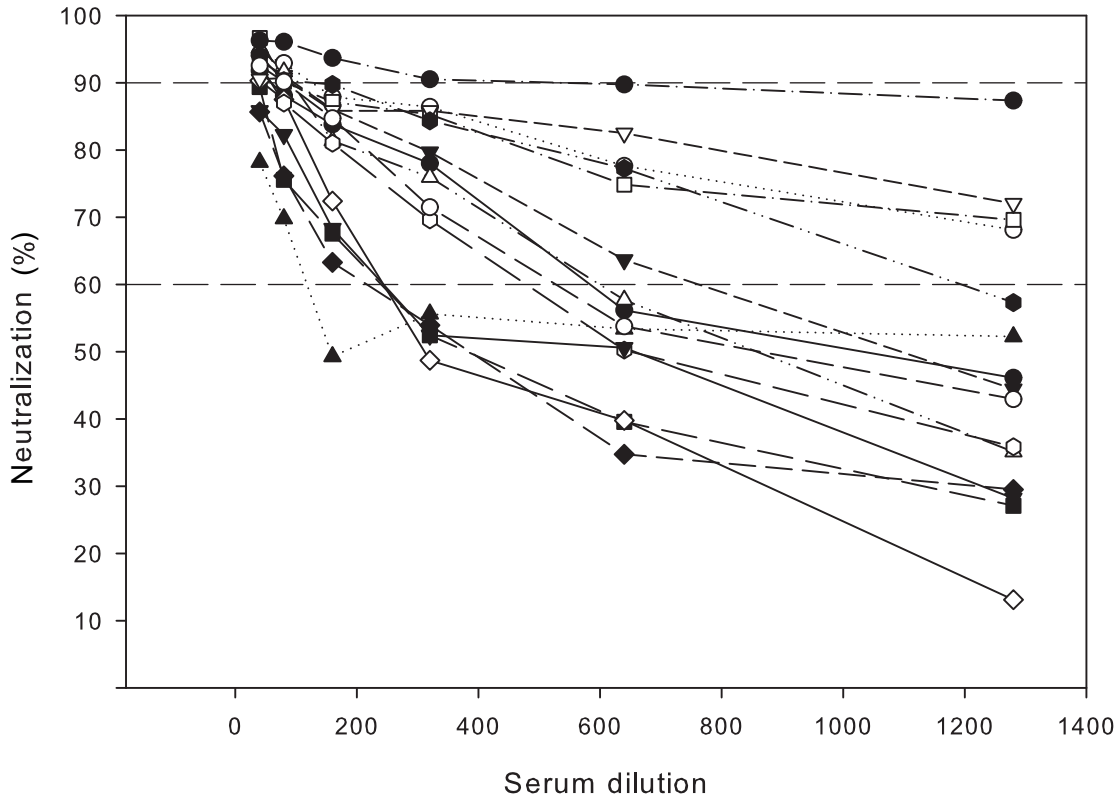

(c)

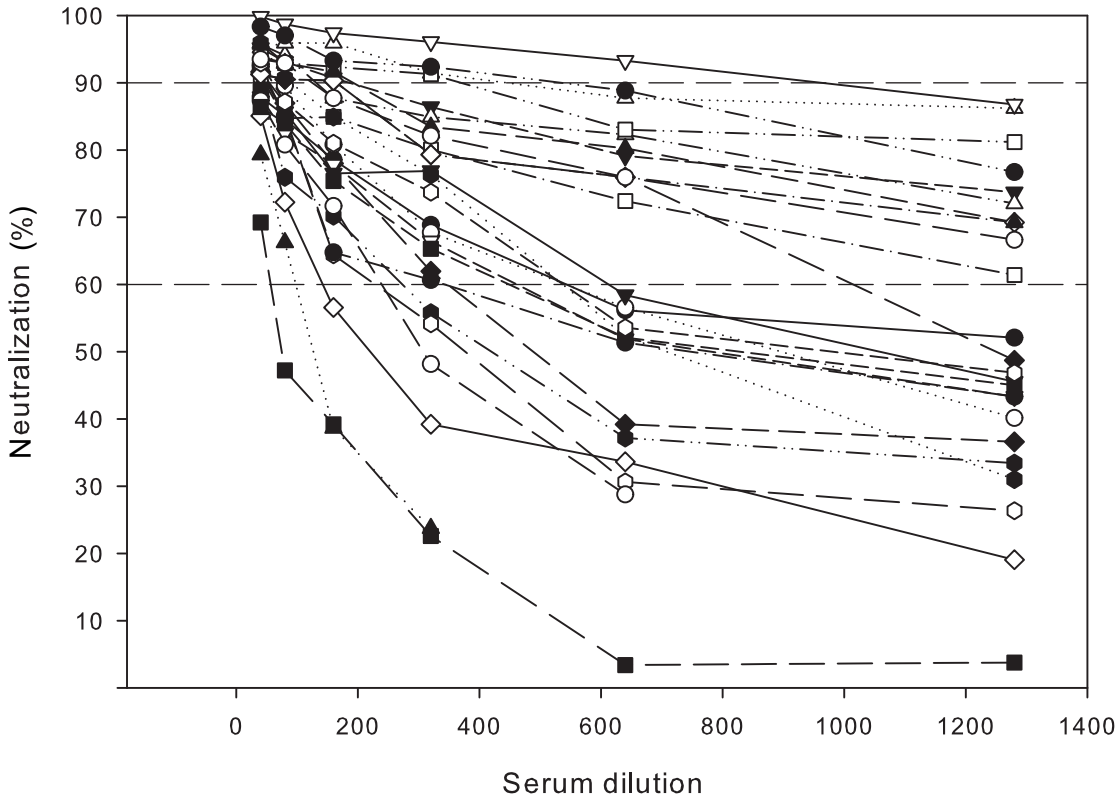

Supplement: supp_90_8_1962__1.pdf [file supp_90_8_1962__1.pdf]
